# Supplementary material for: Comparing distributions of polygenic risk scores of type 2 diabetes and coronary heart disease within different populations
Source: PLoS One. 2017 Jul 5;12(7):e0179238. doi: 10.1371/journal.pone.0179238 (PMC5497939; doi:10.1371/journal.pone.0179238)
Supplement: S1 File — (XLSX) [file pone.0179238.s001.xlsx]

## Sheet: T2D
SNP	Beta in T2D model	Pi in T2D model	Weight in T2D model	Was missing in EGCUT data?	Was missing in 1000G data?
rs1000763	0.044	0.083	0.003652	yes	no
rs10008490	0.043	0.06	0.00258	yes	no
rs10036800	0.064	0.112	0.007168	no	yes
rs10066037	-0.027	0.15	-0.00405	no	yes
rs10462842	0.042	0.209	0.008778	no	yes
rs10508458	0.019	0.069	0.001311	yes	no
rs10512513	-0.014	0.062	-0.000868	yes	no
rs10518929	-0.024	0.11	-0.00264	yes	no
rs10920293	0.022	0.071	0.001562	yes	no
rs11099916	-0.022	0.057	-0.001254	yes	no
rs11126317	-0.013	0.059	-0.000767	yes	no
rs11602685	0.046	0.149	0.006854	yes	no
rs11611335	0.122	0.313	0.038186	no	yes
rs11741879	0.015	0.063	0.000945	no	yes
rs11850744	0.032	0.192	0.006144	yes	no
rs12038793	-0.028	0.118	-0.003304	yes	no
rs12131553	0.048	0.124	0.005952	yes	no
rs12146944	0.039	0.103	0.004017	yes	no
rs12152701	-0.024	0.093	-0.002232	yes	no
rs13070015	0.023	0.078	0.001794	no	yes
rs13088513	0.033	0.213	0.007029	yes	no
rs1367378	-0.026	0.135	-0.00351	no	yes
rs1372876	-0.03	0.195	-0.00585	yes	no
rs1395157	-0.029	0.068	-0.001972	no	yes
rs1400286	-0.034	0.087	-0.002958	yes	no
rs1432096	0.031	0.082	0.002542	yes	no
rs1501672	0.049	0.24	0.01176	yes	no
rs1535711	0.012	0.054	0.000648	yes	no
rs16871636	0.021	0.047	0.000987	no	yes
rs16923367	-0.03	0.106	-0.00318	no	yes
rs1709544	-0.035	0.238	-0.00833	yes	no
rs17284164	-0.02	0.088	-0.00176	yes	no
rs1879532	-0.013	0.053	-0.000689	yes	no
rs1981205	-0.024	0.137	-0.003288	yes	no
rs2046335	-0.011	0.053	-0.000583	yes	no
rs2060424	-0.028	0.088	-0.002464	yes	no
rs2293889	0.035	0.196	0.00686	yes	no
rs234452	0.024	0.11	0.00264	yes	no
rs2347214	0.046	0.185	0.00851	yes	no
rs2429909	-0.042	0.307	-0.012894	yes	no
rs2500495	0.07	0.081	0.00567	yes	no
rs251022	0.022	0.123	0.002706	yes	no
rs2581668	-0.067	0.158	-0.010586	no	yes
rs2622790	-0.017	0.057	-0.000969	yes	no
rs2647691	0.035	0.129	0.004515	no	yes
rs2733744	0.034	0.112	0.003808	yes	no
rs2785684	0.022	0.061	0.001342	yes	no
rs3097437	0.109	0.16	0.01744	yes	no
rs343114	0.021	0.079	0.001659	no	yes
rs348737	0.102	0.182	0.018564	no	yes
rs356220	-0.035	0.236	-0.00826	yes	no
rs3782680	0.024	0.11	0.00264	no	yes
rs3864041	-0.025	0.127	-0.003175	yes	no
rs3902989	0.048	0.1	0.0048	yes	no
rs3914628	-0.038	0.173	-0.006574	yes	no
rs398800	0.034	0.194	0.006596	yes	no
rs3995688	0.023	0.112	0.002576	yes	no
rs4016189	-0.01	0.043	-0.00043	yes	no
rs40465	0.016	0.057	0.000912	no	yes
rs406894	-0.051	0.339	-0.017289	yes	no
rs41098	0.03	0.145	0.00435	yes	no
rs4297989	0.024	0.105	0.00252	yes	no
rs4312294	-0.048	0.079	-0.003792	no	yes
rs4381411	0.011	0.061	0.000671	no	yes
rs4674214	0.043	0.101	0.004343	no	yes
rs4778210	0.02	0.052	0.00104	no	yes
rs4876080	0.021	0.119	0.002499	yes	no
rs4984357	0.017	0.059	0.001003	yes	no
rs529565	0.05	0.434	0.0217	yes	no
rs6006678	0.063	0.161	0.010143	yes	no
rs6512586	-0.013	0.079	-0.001027	yes	no
rs6532731	-0.043	0.118	-0.005074	yes	no
rs6539552	0.048	0.182	0.008736	yes	no
rs6571582	-0.03	0.051	-0.00153	yes	no
rs658386	-0.018	0.068	-0.001224	yes	no
rs658856	0.104	0.396	0.041184	yes	no
rs6594417	0.027	0.162	0.004374	yes	no
rs6681392	0.018	0.062	0.001116	yes	no
rs6688000	0.043	0.086	0.003698	yes	yes
rs6689840	-0.041	0.122	-0.005002	yes	no
rs6692618	0.037	0.141	0.005217	yes	no
rs6780103	-0.016	0.072	-0.001152	yes	no
rs685907	0.053	0.138	0.007314	yes	no
rs7035655	0.052	0.099	0.005148	yes	no
rs7132326	0.056	0.141	0.007896	no	yes
rs726955	0.019	0.095	0.001805	yes	no
rs7307991	-0.019	0.084	-0.001596	no	yes
rs731119	0.062	0.405	0.02511	yes	no
rs731874	0.014	0.071	0.000994	yes	no
rs7359655	0.023	0.091	0.002093	yes	no
rs7443214	-0.015	0.082	-0.00123	no	yes
rs7562048	-0.02	0.108	-0.00216	yes	no
rs765135	-0.016	0.055	-0.00088	yes	no
rs766470	-0.011	0.055	-0.000605	no	yes
rs7683704	0.058	0.25	0.0145	yes	no
rs7684945	-0.057	0.186	-0.010602	yes	no
rs7701	0.041	0.305	0.012505	yes	no
rs7734558	-0.015	0.067	-0.001005	no	yes
rs7841854	-0.031	0.153	-0.004743	yes	no
rs8081716	-0.032	0.083	-0.002656	yes	no
rs8089263	-0.049	0.188	-0.009212	yes	no
rs844590	0.032	0.05	0.0016	yes	no
rs878196	0.036	0.256	0.009216	no	yes
rs9850770	0.034	0.159	0.005406	yes	no
rs986633	0.021	0.055	0.001155	yes	no
rs9890316	0.019	0.07	0.00133	yes	no
rs9941639	0.03	0.105	0.00315	yes	no

## Sheet: CHD
SNP	Beta/weight in CHD model	Was missing in EGCUT data?	Was missing in 1000G data?
rs1000763	0.04064	yes	no
rs10008490	0.040914	yes	no
rs10013982	0.014958	yes	no
rs10036524	0.006557	yes	no
rs10036800	0.021356	yes	yes
rs10057009	0.002084	yes	yes
rs1005742	0.006288	yes	no
rs1006656	0.006927	yes	no
rs10077885	0.009524	yes	yes
rs10079477	0.006753	yes	yes
rs10115900	0.004622	yes	no
rs1012822	0.007056	yes	no
rs10132701	0.007389	yes	no
rs10140933	0.000275	yes	no
rs10157351	0.00174	yes	no
rs10227995	0.022405	yes	no
rs10233622	0.009283	yes	no
rs10235998	0.007486	yes	no
rs10250240	0.02229	yes	no
rs10259734	0.015752	yes	yes
rs1030690	0.002198	yes	no
rs1036495	0.020631	yes	no
rs1036556	0.004421	yes	no
rs10416457	0.002509	yes	yes
rs10418603	0.001458	yes	no
rs10459096	0.003669	yes	yes
rs10462842	0.008027	yes	yes
rs1047964	0.018213	yes	no
rs10490245	0.048066	yes	no
rs10492166	0.007242	yes	yes
rs10492416	0.025024	yes	no
rs10492943	0.029387	yes	no
rs10502207	0.008682	yes	no
rs10508458	0.006384	yes	no
rs10512513	0.002706	yes	no
rs10516865	0.018709	yes	no
rs10518929	0.021624	yes	no
rs10520995	0.019499	yes	yes
rs1066669	0.018171	yes	no
rs10768118	0.004157	yes	no
rs10768704	0.062346	yes	yes
rs10772137	0.008265	yes	yes
rs1077430	0.021564	yes	no
rs10794472	0.013399	yes	no
rs10800269	0.00609	yes	no
rs10802698	0.010623	yes	no
rs10814662	0.002808	yes	no
rs10821700	0.020629	yes	no
rs10833145	0.014766	yes	yes
rs10845432	0.011998	yes	yes
rs10845708	0.001567	yes	yes
rs10865054	0.009535	yes	yes
rs10869720	0.003069	yes	no
rs10876882	0.029735	yes	no
rs10886694	0.01309	yes	no
rs10887621	0.00169	yes	no
rs10906096	0.001335	yes	no
rs10917751	0.000101	yes	no
rs10946255	0.002247	yes	yes
rs10951185	0.002054	yes	yes
rs11037966	0.026045	yes	no
rs1104732	0.020672	yes	no
rs11054570	0.045712	yes	yes
rs11057119	0.004599	yes	yes
rs11064498	0.023519	yes	yes
rs11118949	0.042464	yes	no
rs11126317	0.01571	yes	no
rs11138049	0.005198	yes	no
rs11177669	0.019343	yes	no
rs11198981	0.018595	yes	no
rs11234161	0.006663	yes	no
rs11239573	0.020771	yes	no
rs11242323	0.016784	yes	yes
rs112444768	0.000987	yes	no
rs1124922	0.002581	yes	no
rs11250131	0.018315	yes	no
rs114024971	0.00321	yes	no
rs114133352	0.009364	yes	no
rs114448292	0.012673	yes	no
rs114850510	0.009229	yes	no
rs114937086	0.002657	yes	no
rs114941286	0.012292	yes	no
rs114980741	0.011145	yes	no
rs115179837	0.001396	yes	no
rs11523905	0.00308	yes	no
rs115388481	0.005326	yes	no
rs115431024	0.012482	yes	no
rs11573742	0.045593	yes	no
rs11592949	0.036995	yes	no
rs1159923	0.035432	yes	no
rs11600112	0.03368	yes	no
rs11602685	0.008203	yes	no
rs11613352	0.023554	yes	no
rs11613431	0.004168	yes	no
rs11623033	0.01849	yes	no
rs1163397	0.023278	yes	no
rs116395195	0.014262	yes	no
rs116430267	0.012863	yes	no
rs11655682	0.013066	yes	no
rs11694335	0.008239	yes	no
rs11694824	0.002778	yes	no
rs11701361	0.000939	yes	no
rs11702555	0.018557	yes	no
rs11711720	0.017964	yes	no
rs11715896	0.019712	yes	no
rs11738457	0.01295	yes	yes
rs11740580	0.010613	yes	yes
rs11741879	0.020038	yes	yes
rs11745703	0.002136	yes	yes
rs11749226	0.010595	yes	yes
rs11775898	0.008207	yes	no
rs11775933	0.006975	yes	no
rs11781930	0.028747	yes	no
rs11787055	0.016892	yes	no
rs11788468	0.02937	yes	no
rs11842944	0.047113	yes	no
rs11850744	0.011236	yes	no
rs11896096	0.066855	yes	no
rs11949101	0.025252	yes	yes
rs1198329	0.000398	yes	no
rs11986310	0.009564	yes	yes
rs12032929	0.00463	yes	no
rs12038793	0.027395	yes	no
rs1205693	0.005745	yes	no
rs12103094	0.044213	yes	no
rs12117078	0.02092	yes	no
rs12146944	0.007497	yes	no
rs12194248	0.03316	yes	no
rs12200734	0.026326	yes	no
rs12207923	0.01194	yes	no
rs12218663	0.038188	yes	no
rs1222069	0.02684	yes	no
rs1223790	0.01653	yes	yes
rs12257556	0.001301	yes	no
rs12288141	0.046529	yes	no
rs12309	0.00701	yes	no
rs12323553	0.00157	yes	no
rs12326720	0.026828	yes	no
rs12354247	0.011836	yes	no
rs12356676	0.021766	yes	no
rs12416447	0.01586	yes	no
rs12425791	0.01145	yes	no
rs12427648	0.003065	yes	no
rs12435366	0.001723	yes	no
rs12435854	0.020987	yes	no
rs12451876	0.001305	yes	no
rs12464380	0.006437	yes	no
rs12469179	0.004172	yes	no
rs12493292	0.00923	yes	no
rs12522446	0.029309	yes	yes
rs12526522	0.032789	yes	no
rs12536019	0.031187	yes	no
rs1253682	0.010274	yes	no
rs12539069	0.004739	yes	no
rs12548055	0.01203	yes	no
rs12591216	0.015246	yes	no
rs12608629	0.011907	yes	no
rs12612981	0.000716	yes	no
rs12625513	0.037839	yes	no
rs12638374	0.109885	yes	no
rs12665067	0.002753	yes	no
rs12672015	0.008697	yes	no
rs12737081	0.019604	yes	no
rs12746457	0.011355	yes	no
rs12747517	0.044102	yes	no
rs1293388	0.003436	yes	no
rs12956917	0.023939	yes	no
rs12989197	0.00174	yes	no
rs1317482	0.004264	yes	no
rs13187319	0.023501	yes	no
rs13189382	0.08219	yes	yes
rs1321105	0.008626	yes	no
rs13217929	0.018654	yes	no
rs13219492	0.023918	yes	no
rs13221920	0.016373	yes	no
rs13259316	0.00866	yes	no
rs13270497	0.010659	yes	no
rs13271514	0.011524	yes	no
rs13276454	0.0048	yes	no
rs13283706	0.008886	yes	no
rs1331355	0.008905	yes	no
rs1334241	0.007885	yes	no
rs13377908	0.000924	yes	yes
rs13390244	0.013067	yes	no
rs13438451	0.003224	yes	no
rs1365793	0.004028	yes	no
rs1366423	0.001322	yes	no
rs1372876	0.015485	yes	no
rs1389258	0.008819	yes	no
rs1400286	0.026871	yes	no
rs1404874	0.007025	yes	no
rs1407252	0.011876	yes	no
rs1416065	0.00096	yes	no
rs1422375	0.006046	yes	yes
rs1422920	0.005756	yes	yes
rs1436883	0.018048	yes	no
rs1440604	0.006406	yes	no
rs1444852	0.004088	yes	no
rs1463863	0.024123	yes	no
rs1467330	0.014335	yes	no
rs1473164	0.009621	yes	yes
rs1474925	0.031149	yes	no
rs1477110	0.004849	yes	no
rs1486339	0.003628	yes	no
rs1501672	0.028556	yes	no
rs1505287	0.006791	yes	no
rs1508800	0.012055	yes	yes
rs1518207	0.027111	yes	no
rs1546920	0.016215	yes	no
rs1547587	0.000969	yes	no
rs1551150	0.005427	yes	yes
rs1553239	0.007921	yes	yes
rs155854	0.001977	yes	no
rs1564333	0.025509	yes	no
rs16825484	0.000116	yes	no
rs16871636	0.004272	yes	yes
rs16882003	0.010178	yes	no
rs16907917	0.036612	yes	no
rs16918212	0.012788	yes	yes
rs169210	0.016295	yes	no
rs16923484	0.011854	yes	no
rs16928328	0.028664	yes	no
rs16947881	0.028034	yes	yes
rs16997464	0.009942	yes	no
rs17010959	0.052425	yes	no
rs17031294	0.015166	yes	no
rs17035482	0.006137	yes	no
rs17046887	0.032447	yes	no
rs17051053	0.000599	yes	no
rs17069590	0.033748	yes	no
rs17103109	0.024752	yes	no
rs17103667	0.03475	yes	no
rs17141732	0.001914	yes	no
rs17147507	0.004355	yes	no
rs17153698	0.020791	yes	no
rs17158339	0.010199	yes	no
rs17160081	0.01254	yes	no
rs17165669	0.007087	yes	no
rs17200597	0.005744	yes	yes
rs17237810	0.122001	yes	no
rs17279806	0.052747	yes	no
rs17284164	0.011181	yes	no
rs17304212	0.005309	yes	no
rs17382396	0.018529	yes	no
rs17443211	0.033802	yes	no
rs17479870	0.012467	yes	no
rs17514846	0.053458	yes	no
rs17559596	0.011355	yes	no
rs17564079	0.01329	yes	no
rs17588241	0.00588	yes	no
rs17619675	0.015778	yes	no
rs17631890	0.008261	yes	no
rs17688329	0.00608	yes	yes
rs17700722	0.020981	yes	no
rs17703964	0.032761	yes	no
rs17720712	0.004722	yes	no
rs17726914	0.046026	yes	yes
rs17732137	0.034474	yes	yes
rs17737195	0.023586	yes	no
rs17754055	0.002999	yes	no
rs17774495	0.018154	yes	no
rs17782989	0.022722	yes	no
rs17789445	0.035967	yes	yes
rs17801353	0.007325	yes	yes
rs17802269	0.019071	yes	no
rs17805558	0.016505	yes	yes
rs1790879	0.025727	yes	no
rs1805720	0.001198	yes	yes
rs1805760	0.020788	yes	yes
rs1843115	0.007115	yes	no
rs184737	0.026393	yes	yes
rs1860796	0.034892	yes	no
rs1879532	0.012889	yes	no
rs1883830	0.017601	yes	no
rs1890767	0.032445	yes	no
rs1908952	0.004314	yes	no
rs1916634	0.023668	yes	yes
rs1954624	0.001367	yes	no
rs1963570	0.009998	yes	yes
rs1988145	0.004423	yes	yes
rs199634	0.015406	yes	no
rs1999996	0.007743	yes	no
rs201268	0.003909	yes	no
rs2027212	0.004494	yes	no
rs2037842	0.010626	yes	no
rs2046335	0.024633	yes	no
rs2047383	0.002038	yes	yes
rs2056610	0.005796	yes	no
rs2058246	0.016577	yes	no
rs2060424	0.008745	yes	no
rs2062708	0.011995	yes	no
rs2076284	0.014833	yes	no
rs2104448	0.005406	yes	no
rs2110073	0.01453	yes	yes
rs2125598	0.00219	yes	no
rs2161258	0.011923	yes	no
rs2163379	0.00675	yes	no
rs2194703	0.008557	yes	yes
rs2197506	0.003898	yes	yes
rs2223079	0.003218	yes	no
rs2240122	0.004348	yes	no
rs226202	0.002259	yes	no
rs2269502	0.016705	yes	no
rs2270958	0.032628	yes	no
rs2274162	0.013718	yes	no
rs2274184	0.038765	yes	no
rs2285949	0.013958	yes	no
rs2302516	0.051109	yes	yes
rs2314380	0.013741	yes	no
rs2316825	0.002363	yes	no
rs2322592	0.017541	yes	no
rs2345999	0.023698	yes	no
rs235305	0.008183	yes	no
rs2381469	0.003681	yes	no
rs2397022	0.002143	yes	yes
rs2407749	0.015674	yes	no
rs2408955	0.020615	yes	yes
rs2410807	0.007075	yes	no
rs2415952	0.013069	yes	no
rs2419911	0.001222	yes	yes
rs2429909	0.023337	yes	no
rs2442794	0.015793	yes	no
rs245919	0.008775	yes	yes
rs2500495	0.001518	yes	no
rs2504048	0.007398	yes	no
rs251022	0.003692	yes	no
rs2526105	0.031774	yes	no
rs2554727	0.00476	yes	yes
rs2595473	0.002778	yes	no
rs2599263	0.008237	yes	no
rs2622790	0.005034	yes	no
rs2647232	0.006163	yes	no
rs2666895	0.013042	yes	no
rs2673513	0.026539	yes	no
rs2697511	0.017898	yes	no
rs2722824	0.025886	yes	no
rs2764673	0.024775	yes	no
rs2764928	0.035302	yes	no
rs2765539	0.026461	yes	no
rs2776995	0.012568	yes	no
rs2785966	0.004058	yes	yes
rs2806233	0.013258	yes	yes
rs2811708	0.033598	yes	no
rs2815155	0.009058	yes	no
rs283128	0.008612	yes	yes
rs284497	0.008685	yes	no
rs2867936	0.00538	yes	yes
rs2891546	0.018284	yes	no
rs2902438	0.012408	yes	no
rs2907830	0.016123	yes	yes
rs2930648	0.003883	yes	no
rs2941878	0.00594	yes	yes
rs2956606	0.011046	yes	no
rs2961806	0.008806	yes	yes
rs2961831	0.006565	yes	yes
rs2966097	0.013298	yes	no
rs2966964	0.023116	yes	yes
rs3026713	0.009994	yes	no
rs3115378	0.004979	yes	no
rs337705	0.020053	yes	no
rs343114	0.017365	yes	yes
rs348737	0.029661	yes	yes
rs356220	0.000537	yes	no
rs35902	0.004506	yes	no
rs36950	0.005033	yes	yes
rs3732048	0.001641	yes	no
rs3733985	0.006274	yes	no
rs3734533	0.025898	yes	no
rs3737435	0.020425	yes	no
rs3759809	0.00018	yes	no
rs3767966	0.011567	yes	no
rs3781283	0.014342	yes	no
rs3782680	0.006197	yes	yes
rs3786812	0.010168	yes	no
rs3800693	0.000605	yes	yes
rs3802758	0.041029	yes	no
rs3804117	0.020364	yes	no
rs3807426	0.021488	yes	no
rs3809218	0.002136	yes	yes
rs3809401	0.015788	yes	no
rs3849724	0.008982	yes	yes
rs3861717	0.020849	yes	yes
rs3864041	0.003811	yes	no
rs3886172	0.022512	yes	no
rs3902989	0.027809	yes	no
rs3903279	0.01088	yes	no
rs3914628	0.001265	yes	no
rs3914907	0.019813	yes	yes
rs3924462	0.018982	yes	no
rs396610	0.006757	yes	no
rs398800	0.003186	yes	no
rs3995688	0.005463	yes	no
rs4013197	0.016494	yes	no
rs40465	0.016279	yes	yes
rs406217	0.008287	yes	yes
rs406894	0.006085	yes	no
rs407927	0.004984	yes	yes
rs4084853	0.047206	yes	no
rs41098	0.01059	yes	no
rs419353	0.01199	yes	yes
rs4242360	0.000409	yes	yes
rs4242382	0.020236	yes	no
rs42543	0.004214	yes	no
rs430949	0.004201	yes	no
rs4309741	0.007158	yes	no
rs4336354	0.016248	yes	yes
rs4359316	0.011365	yes	no
rs4381411	0.020543	yes	yes
rs4387618	0.010249	yes	yes
rs4400288	0.006804	yes	no
rs440834	0.005743	yes	no
rs4421129	0.022194	yes	no
rs445096	0.001489	yes	yes
rs4463921	0.020795	yes	yes
rs4510858	0.010806	yes	no
rs4512409	0.007443	yes	yes
rs4537960	0.043299	yes	no
rs4550782	0.001004	yes	no
rs4577327	0.015869	yes	no
rs4620037	0.00854	yes	no
rs4666355	0.008077	yes	no
rs4669835	0.007028	yes	no
rs4674214	0.022016	yes	yes
rs4678677	0.00589	yes	no
rs4680104	0.005232	yes	no
rs4688964	0.009818	yes	no
rs4709609	0.017753	yes	no
rs4712988	0.006226	yes	no
rs4717395	0.005878	yes	no
rs4718583	0.040282	yes	no
rs4721732	0.011504	yes	no
rs4727833	0.000398	yes	no
rs4731717	0.014631	yes	no
rs4738466	0.021997	yes	no
rs4744241	0.001859	yes	no
rs4750537	0.007045	yes	no
rs4757456	0.050596	yes	no
rs4770993	0.001975	yes	no
rs4778210	0.004964	yes	yes
rs4783824	0.007051	yes	no
rs4784986	0.007257	yes	no
rs4788592	0.014548	yes	no
rs4818066	0.012839	yes	no
rs4820179	0.039882	yes	yes
rs4846551	0.015929	yes	yes
rs4855516	0.000155	yes	no
rs4865591	0.016288	yes	yes
rs4876080	0.009322	yes	no
rs487624	0.009588	yes	no
rs4878678	0.020789	yes	no
rs4883189	0.008361	yes	yes
rs4883193	0.020804	yes	yes
rs4883201	0.016043	yes	yes
rs4916511	0.015932	yes	no
rs4916829	0.000964	yes	yes
rs4920966	0.013405	yes	yes
rs4922128	0.01164	yes	no
rs4932550	0.025478	yes	no
rs4944804	0.00996	yes	no
rs4949492	0.03274	yes	no
rs4955779	0.022195	yes	no
rs4958072	0.007143	yes	yes
rs5024546	0.004702	yes	no
rs514212	0.004344	yes	no
rs571643	0.015204	yes	no
rs573397	0.009337	yes	no
rs5760410	0.011139	yes	no
rs580469	0.007347	yes	no
rs598440	0.018986	yes	yes
rs5996847	0.039701	yes	no
rs6006678	0.019331	yes	no
rs6010652	0.018141	yes	no
rs6021974	0.003753	yes	no
rs6026978	0.017032	yes	no
rs603089	0.004076	yes	no
rs6038729	0.013323	yes	no
rs6039268	0.00865	yes	yes
rs6052346	0.003704	yes	no
rs6060639	0.00508	yes	no
rs6064357	0.078039	yes	yes
rs6079780	0.000538	yes	no
rs6091430	0.004723	yes	no
rs6102109	0.001885	yes	no
rs634788	0.002604	yes	no
rs642495	0.00266	yes	no
rs6432516	0.043114	yes	no
rs6433103	0.016902	yes	no
rs6454989	0.005383	yes	no
rs6463372	0.005665	yes	no
rs6483491	0.043512	yes	no
rs6487733	0.019802	yes	yes
rs6499628	0.001077	yes	no
rs6512586	0.02257	yes	no
rs6532731	0.033382	yes	no
rs6549819	0.02214	yes	no
rs657152	0.018478	yes	no
rs6571582	0.027814	yes	no
rs658386	0.003909	yes	no
rs658856	0.016041	yes	no
rs6594417	0.002784	yes	no
rs659543	0.000829	yes	no
rs6603811	0.005703	yes	yes
rs6681392	0.02774	yes	no
rs6689840	0.022935	yes	no
rs6698628	0.039856	yes	no
rs6715314	0.007595	yes	no
rs6722374	0.014612	yes	no
rs674816	0.011276	yes	no
rs6784441	0.00092	yes	no
rs6786123	0.017327	yes	no
rs6799759	0.022946	yes	no
rs6851867	0.010107	yes	no
rs6856024	0.016783	yes	no
rs685907	0.016132	yes	no
rs6865273	0.018125	yes	yes
rs6869442	0.001657	yes	yes
rs6872807	0.013935	yes	yes
rs6873339	0.006037	yes	yes
rs6894469	0.010175	yes	no
rs6922592	0.012124	yes	no
rs6929370	0.017055	yes	no
rs6933007	0.014866	yes	no
rs6939589	0.003753	yes	no
rs6951025	0.001517	yes	no
rs6960499	0.005465	yes	no
rs696945	0.011504	yes	no
rs699370	0.035673	yes	no
rs7003476	0.016708	yes	yes
rs700926	0.025636	yes	yes
rs7017508	3.6e-05	yes	no
rs7019421	0.009277	yes	no
rs702477	0.009389	yes	no
rs7035655	0.049324	yes	no
rs7089633	0.017187	yes	no
rs7096781	0.007631	yes	no
rs7123361	0.011798	yes	no
rs7132326	0.046278	yes	yes
rs7173954	0.00405	yes	no
rs719904	0.032402	yes	yes
rs7204626	0.003814	yes	no
rs720742	0.001072	yes	no
rs722559	0.026908	yes	no
rs723348	0.042908	yes	yes
rs723548	0.005463	yes	yes
rs7237908	0.002029	yes	no
rs7245958	0.005216	yes	no
rs7252966	0.016967	yes	no
rs726955	0.010294	yes	no
rs7307991	0.013992	yes	yes
rs7311244	0.00296	yes	yes
rs732478	0.011511	yes	yes
rs7359655	0.000376	yes	no
rs739467	0.022295	yes	no
rs7484554	0.030186	yes	yes
rs74942078	0.010058	yes	no
rs7523414	0.039747	yes	no
rs7537207	0.006047	yes	yes
rs7562048	0.006378	yes	no
rs756320	0.00615	yes	no
rs7599128	0.019108	yes	no
rs7645895	0.020779	yes	no
rs765135	0.014112	yes	no
rs766470	0.006676	yes	yes
rs7667562	0.031036	yes	no
rs7668598	0.023125	yes	no
rs7683447	0.004613	yes	yes
rs7683704	0.006772	yes	no
rs7684745	0.028691	yes	no
rs7684945	0.003121	yes	no
rs7701280	0.030857	yes	yes
rs7709701	0.002847	yes	yes
rs7715032	0.002803	yes	yes
rs7719326	0.023419	yes	no
rs7720767	0.007729	yes	yes
rs7732617	0.018522	yes	no
rs7734558	0.000551	yes	yes
rs7735038	0.005077	yes	no
rs77473827	0.05349	yes	no
rs7751941	0.009565	yes	no
rs7753109	0.010881	yes	no
rs7753575	0.011894	yes	no
rs7771057	0.010766	yes	yes
rs7774902	0.01932	yes	no
rs7795893	0.005385	yes	no
rs780148	0.014803	yes	no
rs7831051	0.025674	yes	no
rs7841854	0.014458	yes	no
rs7845723	0.023242	yes	no
rs7854075	0.013678	yes	no
rs7873746	0.020669	yes	no
rs7910464	0.004145	yes	no
rs7915142	0.007745	yes	no
rs7928320	0.003736	yes	no
rs7953098	0.011043	yes	no
rs7960944	0.016822	yes	no
rs7969633	0.013072	yes	no
rs7972426	0.010217	yes	yes
rs7973596	0.01261	yes	yes
rs7976793	0.000197	yes	no
rs7982288	0.001159	yes	no
rs7985270	0.00277	yes	no
rs801733	0.005315	yes	no
rs8021249	0.025344	yes	no
rs8042543	0.001523	yes	no
rs8047413	0.009539	yes	no
rs8051232	0.020419	yes	no
rs8055721	0.009339	yes	no
rs8081716	0.014627	yes	no
rs8089263	0.010354	yes	no
rs8097644	0.006062	yes	no
rs8100652	0.021103	yes	no
rs8123020	0.033212	yes	no
rs8176681	0.015696	yes	no
rs831314	0.006925	yes	no
rs836876	0.018023	yes	no
rs837544	0.019623	yes	no
rs838709	0.022853	yes	no
rs844590	0.067479	yes	no
rs854679	0.002528	yes	no
rs860554	0.007944	yes	no
rs872588	0.02087	yes	no
rs878196	0.000857	yes	yes
rs886526	0.011814	yes	yes
rs924152	0.046038	yes	yes
rs9286062	0.003875	yes	no
rs9293787	0.03156	yes	yes
rs9301957	0.012134	yes	no
rs9309846	0.005009	yes	no
rs9356943	0.007894	yes	no
rs9396103	0.00652	yes	no
rs9403083	0.000261	yes	no
rs9470386	0.02675	yes	no
rs9575427	0.010969	yes	no
rs958374	0.006367	yes	no
rs9640023	0.000934	yes	no
rs968918	0.005984	yes	no
rs974312	0.037934	yes	no
rs9788079	0.022971	yes	yes
rs9819099	0.014252	yes	no
rs9819986	0.004981	yes	no
rs9822787	0.051114	yes	no
rs9839514	0.002978	yes	no
rs985002	0.011582	yes	no
rs9850770	0.006783	yes	no
rs9853057	0.013235	yes	no
rs9853486	0.020149	yes	no
rs986633	0.046925	yes	no
rs987621	0.012642	yes	no
rs9890316	0.004471	yes	no
rs9908845	0.009983	yes	no
rs9941639	0.001061	yes	no
rs9977276	0.018818	yes	no
